# Supplementary material for: Predicting lncRNA–Disease Associations Based on a Dual-Path Feature Extraction Network with Multiple Sources of Information Integration
Source: PubMed Central journal article supplement — ACS Omega. 2024 Jul 30;9(32):35100–12. doi: 10.1021/acsomega.4c05365 (PMC11325412; doi:10.1021/acsomega.4c05365), 2024-07-30
Supplement: ao4c05365_si_001.pdf [file ao4c05365_si_001.pdf]

# **Supporting Information for “Predicting lncRNA–disease associations based on a dual-path feature extraction network with multiple sources of information integration”**

**Dengju Yao<sup>1\*</sup>, Binbin Zhang<sup>1</sup>, Xiaojuan Zhan<sup>1,2</sup>, Bo Zhang<sup>1</sup>, Xiang Kui Li<sup>1</sup>**

<sup>1</sup>School of Computer Science and Technology, Harbin University of Science and Technology, Harbin 150080, China;

<sup>2</sup>College of Computer Science and Technology, Heilongjiang Institute of Technology, Harbin, 150050, China;

**\* Correspondence: Dengju Yao**

ydkvictory@hrbust.edu.cn;

# 1. Parameter analysis

## 1.1 GCN Layer Options

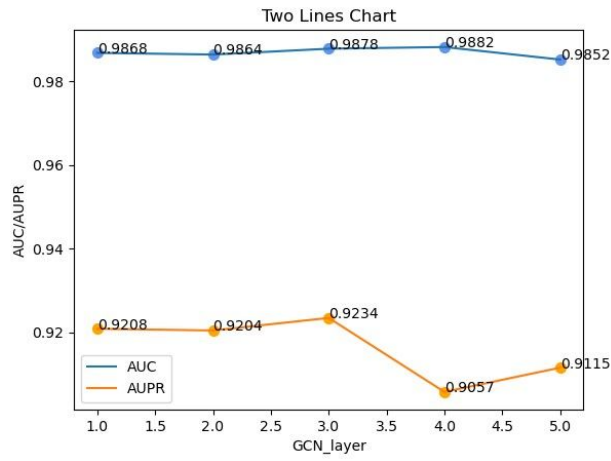

Figure S 1 GCN Layer Options by 5CV1

## 1.2 Optimization of Transformer parameters

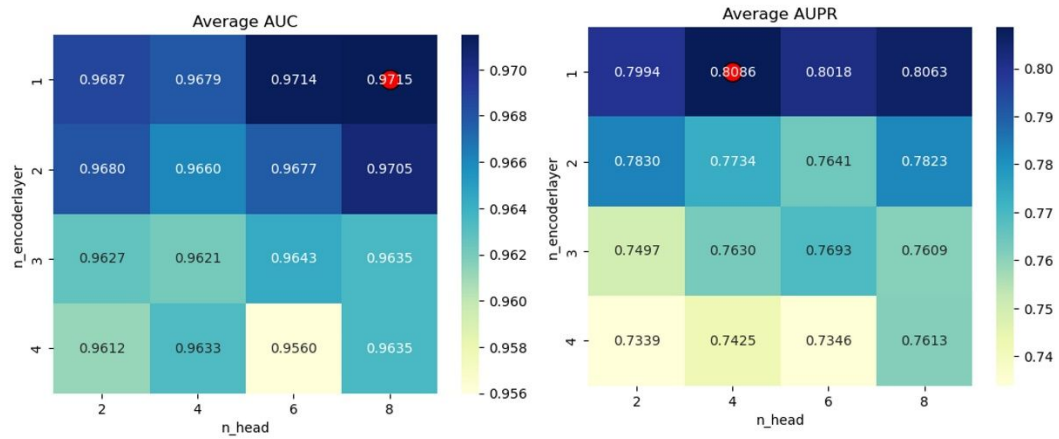

Figure S 2 Optimization of Transformer parameters by 5CV1

### 1.3 Output feature dimension selection

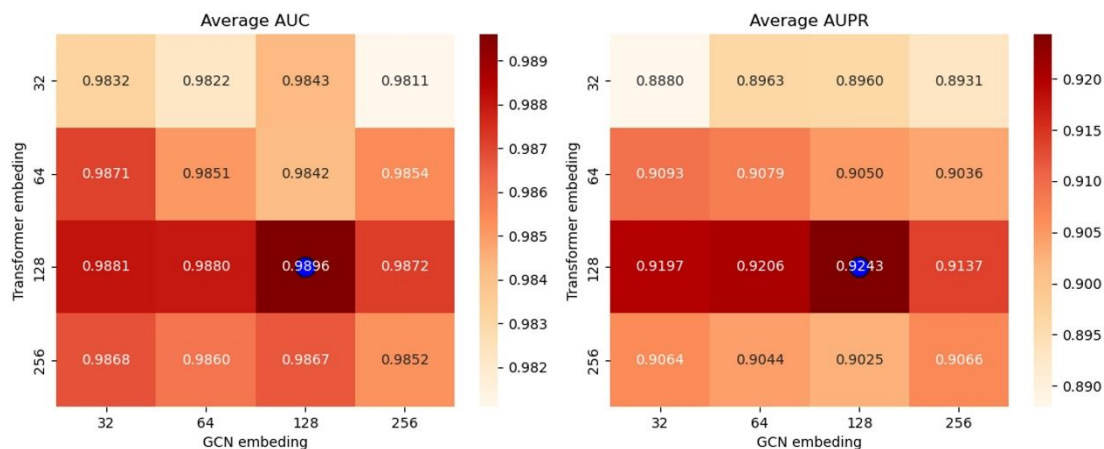

Figure S 3 Feature Size Selection for Dual Paths by 5CV1. The selection of feature sizes in the two paths, with the horizontal axis being the size of the topological features and the vertical axis being the size of the compensating features.

## 2. Classifier Comparison

Table S 1 Comparison of node classifier selection by 5CV1

|            | ACC           | Specificity   | Precision     | Recall        | MCC           | F1-score      |
|------------|---------------|---------------|---------------|---------------|---------------|---------------|
| <b>LR</b>  | 0.9850        | 0.9977        | 0.7249        | 0.3137        | 0.4709        | 0.4379        |
| <b>GNB</b> | 0.8605        | 0.8598        | 0.1078        | <b>0.8950</b> | 0.2823        | 0.1925        |
| <b>SVM</b> | 0.9837        | 0.9983        | 0.7033        | 0.2125        | 0.3810        | 0.3265        |
| <b>RF</b>  | 0.9876        | 0.9982        | 0.8234        | 0.4238        | 0.5856        | 0.5596        |
| <b>XGB</b> | <b>0.9950</b> | <b>0.9993</b> | <b>0.9555</b> | 0.7676        | <b>0.8541</b> | <b>0.8512</b> |

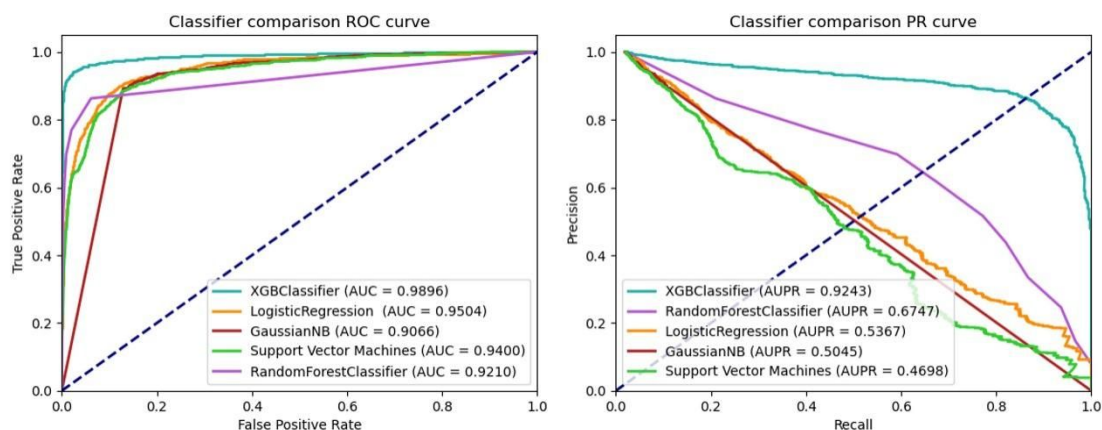

Figure S 4 AUC and AUPR for classifiers by 5CV1

### 3. Model Exploration

#### 3.1 Node Aggregation Layer Technology Options

Table S 2 Node Aggregation Layer Technology Options by CV1 in dataset2

|             | PCA    | ICA    | RP     | NAL           |
|-------------|--------|--------|--------|---------------|
| ACC         | 0.9916 | 0.9912 | 0.9917 | <b>0.9950</b> |
| Specificity | 0.9986 | 0.9989 | 0.9981 | <b>0.9993</b> |
| Sensitivity | 0.6223 | 0.5851 | 0.6248 | <b>0.7676</b> |
| Precision   | 0.8966 | 0.9104 | 0.9020 | <b>0.9555</b> |
| MCC         | 0.7432 | 0.7260 | 0.7470 | <b>0.8541</b> |
| F1-score    | 0.7346 | 0.7124 | 0.7383 | <b>0.8512</b> |
| AUC         | 0.9692 | 0.9679 | 0.9737 | <b>0.9896</b> |
| AUPR        | 0.8104 | 0.8022 | 0.8248 | <b>0.9243</b> |

Comparison of different dimensionality reduction techniques on the structure of node feature extraction network with dual paths is carried out for classification using XGB classifier. The results show the superiority of NAL node aggregation layer.

#### 3.2 Feature Extraction Network Substitution

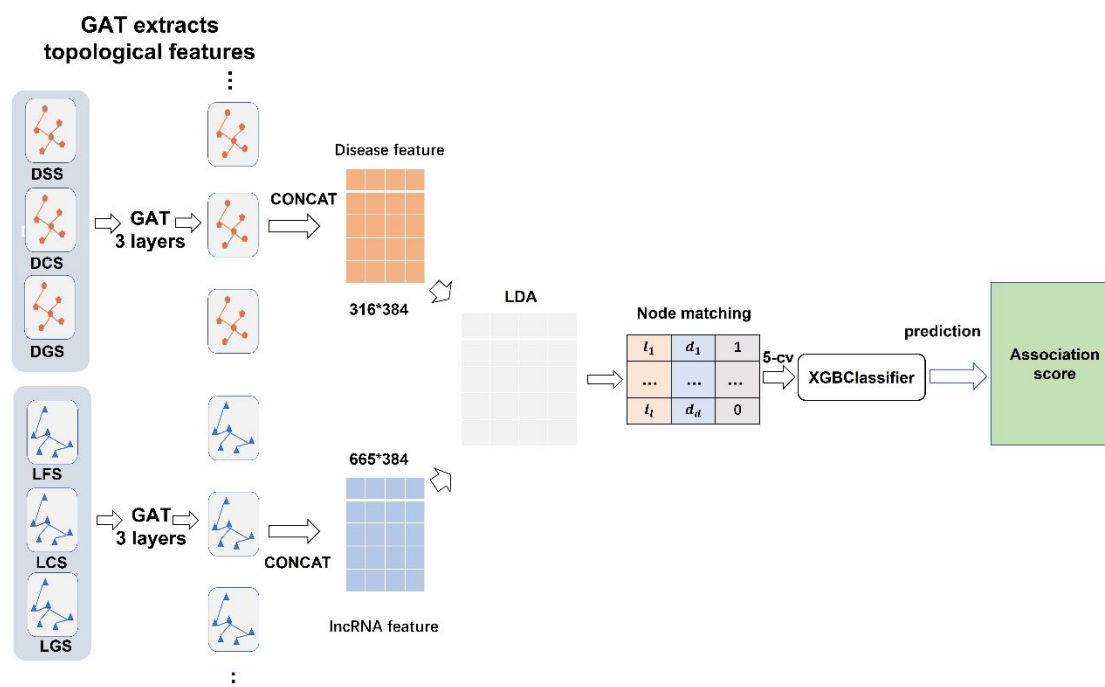

Figure S 5 Flowchart of topological feature extraction network for GAT

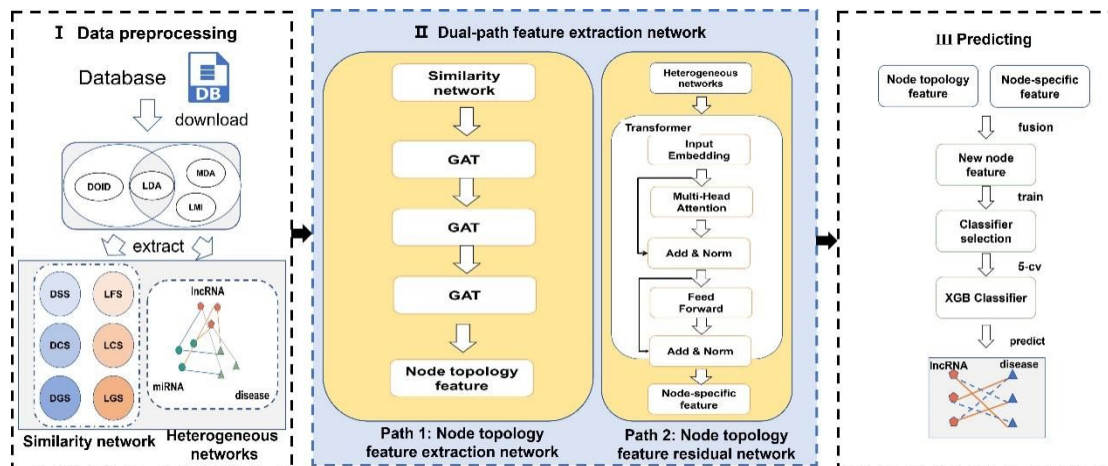

Figure S 6 Topological Feature Replacement for GAT Topological Feature Extraction Network Flowchart

In order to ensure the fairness of the experimental results, the GAT-based feature extraction model and the topological feature extraction network in the dual pathway use the same network topology for the disease view (DSS, DCS, DGS) and the lncRNA view (LFS, LCS, LGS) to explore the node features. The input and output node features are all 128-dimensional, and after feature splicing, the individual nodes become 384-dimensional. All of them are ultimately classified using the XGBoost classifier and result in the final prediction score. In order to further verify whether the node topology residual extraction network can alleviate the problem of disappearing node specificity brought by GAT, we replaced the topology feature extraction network in the dual-path topology extraction network with the graph attention topology feature extraction network. The results are shown in Table S 3.

Table S 3 DPFELDA vs. GAT by 5CV2

| metric      | Dual path feature extraction | GAT    | GAT+ topological feature residual extraction network |
|-------------|------------------------------|--------|------------------------------------------------------|
| ACC         | <b>0.9942</b>                | 0.9847 | 0.9909                                               |
| Specificity | <b>0.9991</b>                | 0.9972 | 0.9989                                               |
| Sensitivity | <b>0.7349</b>                | 0.3239 | 0.5672                                               |
| Precision   | <b>0.9427</b>                | 0.6931 | 0.9134                                               |
| Recall      | <b>0.7349</b>                | 0.3239 | 0.5672                                               |
| MCC         | <b>0.8297</b>                | 0.4675 | 0.7159                                               |
| F1-score    | <b>0.8258</b>                | 0.4415 | 0.6698                                               |
| AUC         | <b>0.9888</b>                | 0.9319 | 0.9640                                               |
| AUPR        | <b>0.9222</b>                | 0.4951 | 0.7928                                               |

## 4. Wilcoxon test analysis

We did a Wilcoxon test analysis using the AUC and AUPR results of each comparison model in the test set on five occasions, which proved that due to the p-value being less than 0.05, the predictive performance of DPFELDA was significantly better than the methods compared.

Table S 4 Results of the paired Wilcoxon test comparing DPFELDA with all other methods on dataset1 and dataset2 by 5CV2

|           | p-value of AUC (D1) | p-value of AUPR (D1) | p-value of AUC(D2) | p-value of AUPR(D2) |
|-----------|---------------------|----------------------|--------------------|---------------------|
| HOPEXGB   | 2.52E-12            | 4.41E-10             | 1.78E-14           | 1.41E-14            |
| SDLDA     | 1.23E-05            | 1.19E-06             | 1.85E-08           | 1.92E-12            |
| GAEMCLDA  | 1.51E-11            | 1.11E-15             | 3.12E-12           | 6.43E-18            |
| IPCARF    | 1.06E-06            | 1.46E-08             | 3.05E-08           | 1.7E-11             |
| LDAformer | 0.001089            | 8.27E-07             | 2.8E-09            | 6.69E-12            |
| GCLMTP    | 1.07E-15            | 5.11E-14             | 1.35E-11           | 6.86E-16            |

Where D1 denotes dataset 1 and D2 denotes dataset 2.

## 5. Case study

### 5.1 Case study on dataset1

#### 1 Breast cancer

Table S 5 breast cancer

| Rank | lncRNA     | Evidence      | PMID     | Rank | lncRNA     | Evidence      | PMID     |
|------|------------|---------------|----------|------|------------|---------------|----------|
| 1    | MEG3       | LncRNADisease | 14602737 | 16   | CCAT2      | lnc2Cancer    | 28480695 |
| 2    | HOTAIR     | LncRNADisease | 19182780 | 17   | UCA1       | LncRNADisease | 16914571 |
| 3    | MALAT1     | LncRNADisease | 18006640 | 18   | LINC00583  | Unknown       |          |
| 4    | PVT1       | LncRNADisease | 17908964 | 19   | SOX2-OT    | LncRNADisease | 26409453 |
| 5    | H19        | LncRNADisease | 28102845 | 20   | ZFAS1      | LncRNADisease | 21460236 |
| 6    | NEAT1      | LncRNADisease | 25417700 | 21   | BCAR4      | LncRNADisease | 21506106 |
| 7    | XIST       | LncRNADisease | 26637364 | 22   | CCAT1      | LncRNADisease | 26464701 |
| 8    | CDKN2B-AS1 | LncRNADisease | 34374638 | 23   | HOTTIP     | LncRNADisease | 29415429 |
| 9    | GAS5       | LncRNADisease | 22487937 | 24   | LINC00472  | LncRNADisease | 29453409 |
| 10   | BCYRN1     | LncRNADisease | 27277684 | 25   | PANDAR     | LncRNADisease | 26927017 |
| 11   | LSINCT5    | lnc2Cancer    | 29785740 | 26   | CASC16     | Literature    | 36540803 |
| 12   | AFAP1-AS1  | lnc2Cancer    | 29974352 | 27   | LINC-PINT  | unknown       |          |
| 13   | KCNQ1OT1   | LncRNADisease | 21304052 | 28   | MIR124-2HG | unknown       |          |
| 14   | LINC-ROR   | LncRNADisease | 26883251 | 29   | CASC2      | lnc2Cancer    | 31352515 |
| 15   | LINC00675  | unknown       |          | 30   | MIR17HG    | EVlncRNAs3    | 36943627 |

#### 2 Gastric cancer

Table S 6 gastric cancer

| Rank | lncRNA     | Evidence        | PMID     | Rank | lncRNA    | Evidence      | PMID     |
|------|------------|-----------------|----------|------|-----------|---------------|----------|
| 1    | MALAT1     | LncRNADisease   | 24857172 | 16   | AFAP1-AS1 | LncRNADisease | 28975981 |
| 2    | MEG3       | LncRNADisease   | 24006224 | 17   | CASC2     | LncRNADisease | 27648142 |
| 3    | CDKN2B-AS1 | LncRNADisease   | 25636450 | 18   | SPRY4-IT1 | LncRNADisease | 25835973 |
| 4    | H19        | LncRNADisease   | 27143813 | 19   | NPTN-IT1  | LncRNADisease | 25674261 |
| 5    | HOTAIR     | LncRNADisease   | 27900563 | 20   | KCNQ1OT1  | LncRNADisease | 25765901 |
| 6    | GAS5       | LncRNADisease   | 25959498 | 21   | BANCR     | LncRNADisease | 26054683 |
| 7    | UCA1       | LncRNADisease   | 26718650 | 22   | TUG1      | LncRNADisease | 27983921 |
| 8    | NEAT1      | LncRNADisease   | 28401449 | 23   | WT1-AS    | LncRNADisease | 26449525 |
| 9    | PVT1       | LncRNADisease   | 25956062 | 24   | TP53COR1  | EVlncRNAs3    | 35947460 |
| 10   | LSINCT5    | lnc2Cancer      | 30127643 | 25   | CCDC26    | EVlncRNAs3    | 31166382 |
| 11   | CCAT1      | lnc2Cancer      | 31478245 | 26   | HOTTIP    | lnc2Cancer    | 27546609 |
| 12   | MIR17HG    | unknown         |          | 27   | TUSC7     | lnc2Cancer    | 25765901 |
| 13   | XIST       | LncRNADisease   | 27620004 | 28   | NPSR1-AS1 | unknown       |          |
| 14   | BCYRN1     | lnc2Cancer      | 31652309 | 29   | ZFAS1     | lnc2Cancer    | 30999814 |
| 15   | CCAT2      | LncRNADisease v | 27904778 | 30   | GHET1     | lnc2Cancer    | 28578256 |

### 3 Colorectal cancer

Table S 7 colorectal cancer

| Rank | lncRNA    | Evidence        | PMID     | Rank | lncRNA   | Evidence      | PMID     |
|------|-----------|-----------------|----------|------|----------|---------------|----------|
| 1    | MALAT1    | lncRNADisease   | 21503572 | 16   | ZFAS1    | lncRNADisease | 26506418 |
| 2    | MEG3      | lncRNADisease   | 25636452 | 17   | BANCR    | lncRNADisease | 25013510 |
| 3    | NPSR1-AS1 | lncRNADisease   | 34406628 | 18   | HOTTIP   | lncRNADisease | 26678886 |
| 4    | LINC00583 | unknown         |          | 19   | CRNDE    | lncRNADisease | 22393467 |
| 5    | HOTAIR    | lncRNADisease   | 21862635 | 20   | UCA1     | lncRNADisease | 26238511 |
| 6    | CAHM      | lncRNADisease   | 24799664 | 21   | GAS5     | lncRNADisease | 27391432 |
| 7    | TUSC7     | lncRNADisease   | 23680400 | 22   | H19      | lncRNADisease | 22427002 |
| 8    | NEAT1     | lncRNADisease   | 26314847 | 23   | TP53COR1 | lncRNADisease | 24573322 |
| 9    | TUG1      | lncRNADisease   | 28302487 | 24   | CCAT1    | lncRNADisease | 23594791 |
| 10   | NCRUPAR   | lncRNADisease   | 25119598 | 25   | SNHG4    | lncRNADisease | 33744866 |
| 11   | PVT1      | lncRNADisease   | 26990997 | 26   | KCNQ1OT1 | lnc2Cancer    | 30997746 |
| 12   | XIST      | lncRNADisease   | 28730777 | 27   | HOTAIRM1 | lncRNADisease | 27307307 |
| 13   | CASC16    | unknown         |          | 28   | LSINCT5  | lnc2Cancer    | 25526476 |
| 14   | CCAT2     | lnc2Cancer v3.0 | 31558855 | 29   | PRNCR1   | lnc2Cancer    | 26530130 |
| 15   | GHET1     | lncRNADisease   | 27131316 | 30   | HULC     | lnc2Cancer    | 27496341 |

## 5.2 Case study on dataset2

### 1 Breast cancer

Table S 8 breast cancer

| Rank | lncRNA       | Evidence      | PMID     | Rank | lncRNA       | Evidence      | PMID     |
|------|--------------|---------------|----------|------|--------------|---------------|----------|
| 1    | LINC00668    | lnc2Cancer    | 32117742 | 16   | LSINCT3      | lncRNADisease | 20214974 |
| 2    | EPB41L4A-AS1 | lnc2Cancer    | 30959550 | 17   | LINC01234    | lncRNADisease | 27338266 |
| 3    | DLEU1        | lncRNADisease | 26416600 | 18   | DRAIC        | lncRNADisease | 25288503 |
| 4    | LINC00673    | lnc2Cancer    | 30094100 | 19   | LINC01016    | lncRNADisease | 26426411 |
| 5    | KCNK15-AS1   | lncRNADisease | 25929808 | 20   | NKILA        | lncRNADisease | 25759022 |
| 6    | MEG3         | lncRNADisease | 22393162 | 21   | STXBP5-AS1   | lncRNADisease | 27338266 |
| 7    | LINC00473    | lnc2Cancer    | 30848493 | 22   | LINC00460    | lnc2Cancer    | 31308741 |
| 8    | SNHG15       | lncRNADisease | 29217194 | 23   | FENRR        | lnc2Cancer    | 29559798 |
| 9    | PCAN-1       | lncRNADisease | 27322459 | 24   | CCAT1        | lncRNADisease | 26464701 |
| 10   | SPRY4-IT1    | lncRNADisease | 25742952 | 25   | PCAN-4       | lncRNADisease | 27322459 |
| 11   | LINC00339    | lncRNADisease | 29453409 | 26   | LINC01296    | lnc2Cancer    | 29559798 |
| 12   | LSINCT10     | lncRNADisease | 20214974 | 27   | LINC00665    | lnc2Cancer    | 32271427 |
| 13   | BANCR        | lnc2Cancer    | 29565494 | 28   | DANCR        | lncRNADisease | 27716745 |
| 14   | MT1JP        | lnc2Cancer    | 32039825 | 29   | RP11-434D9.1 | lncRNADisease | 26910840 |
| 15   | ADARB2-AS1   | lncRNADisease | 26929647 | 30   | SOX2         | lncRNADisease | 25006803 |



## 2 Gastric cancer

Table S 9 gastric cancer

| Rank | lncRNA     | Evidence   | PMID     | Rank | lncRNA      | Evidence   | PMID     |
|------|------------|------------|----------|------|-------------|------------|----------|
| 1    | PCGEM1     | lnc2Cancer | 31421977 | 16   | GAS5        | lnc2Cancer | 31530437 |
| 2    | HCP5       | lnc2Cancer | 32357145 | 17   | LINC00941   | lnc2Cancer | 30723491 |
| 3    | MHRT       | lnc2Cancer | 31273599 | 18   | LINC00675   | lnc2Cancer | 29107103 |
| 4    | LINC00665  | lnc2Cancer | 31736127 | 19   | MIF-AS1     | lnc2Cancer | 30238562 |
| 5    | HIF1A-AS2  | lnc2Cancer | 25686741 | 20   | MIR100HG    | lnc2Cancer | 30886062 |
| 6    | LBX2-AS1   | lnc2Cancer | 32351330 | 21   | SNHG15      | lnc2Cancer | 26662309 |
| 7    | FAM83H-AS1 | lnc2Cancer | 31493939 | 22   | LINC00628   | lnc2Cancer | 27272474 |
| 8    | FALEC      | lnc2Cancer | 30984243 | 23   | PRNCR1      | lnc2Cancer | 26206497 |
| 9    | FEZF1-AS1  | lnc2Cancer | 31785996 | 24   | SNHG16      | lnc2Cancer | 30854107 |
| 10   | LINC00629  | lnc2Cancer | 31674022 | 25   | ZFAS1       | lnc2Cancer | 30999814 |
| 11   | OIP5-AS1   | lnc2Cancer | 32147682 | 26   | TP53TG1     | lnc2Cancer | 27821766 |
| 12   | SPRY4-IT1  | lnc2Cancer | 31330497 | 27   | ADAMTS9-AS2 | lnc2Cancer | 32160650 |
| 13   | DANCR      | lnc2Cancer | 31002130 | 28   | MVIH        | lnc2Cancer | 31773716 |
| 14   | LINC01234  | lnc2Cancer | 32011780 | 29   | TRPM2-AS    | lnc2Cancer | 32123162 |
| 15   | MIAT       | lnc2Cancer | 32274858 | 30   | LINC00668   | lnc2Cancer | 27036039 |

## 3 Colorectal cancer

Table S 10 colorectal cancer

| Rank | lncRNA      | Evidence   | PMID     | Rank | lncRNA       | Evidence   | PMID     |
|------|-------------|------------|----------|------|--------------|------------|----------|
| 1    | LEF1-AS1    | lnc2Cancer | 32248974 | 16   | FEZF1-AS1    | lnc2Cancer | 29914894 |
| 2    | DANCR       | lnc2Cancer | 32159208 | 17   | 91H          | lnc2Cancer | 30978169 |
| 3    | NKILA       | lnc2Cancer | 31423284 | 18   | DLEU1        | lnc2Cancer | 30098595 |
| 4    | LUADT1      | lnc2Cancer | 29762830 | 19   | MEG3         | lnc2Cancer | 32219064 |
| 5    | R05532      | lnc2Cancer | 25421768 | 20   | DUXAP10      | lnc2Cancer | 28779166 |
| 6    | RPL34-AS1   | lnc2Cancer | 24908062 | 21   | PRNCR1       | lnc2Cancer | 24330491 |
| 7    | ST3GAL6-AS1 | lnc2Cancer | 30613961 | 22   | MIAT         | lnc2Cancer | 31567876 |
| 8    | LINC00473   | lnc2Cancer | 30126852 | 23   | LINC01503    | lnc2Cancer | 30542444 |
| 9    | MIR100HG    | lnc2Cancer | 31814848 | 24   | SNHG16       | lnc2Cancer | 30962265 |
| 10   | SPRY4-IT1   | lnc2Cancer | 28099409 | 25   | LINC00675    | lnc2Cancer | 29524886 |
| 11   | FENDRR      | lnc2Cancer | 31724220 | 26   | TI21327      | None       | None     |
| 12   | LINC00472   | lnc2Cancer | 29488624 | 27   | FAM83H-AS1   | lnc2Cancer | 29434883 |
| 13   | lncAGER     | lnc2Cancer | 32031046 | 28   | LOC100292680 | None       | None     |
| 14   | CRNDE-h     | lnc2Cancer | 27042112 | 29   | IGKV         | None       | None     |
| 15   | ZFAS1       | lnc2Cancer | 30250022 | 30   | TINCR        | lnc2Cancer | 30853664 |

## 4 hepatocellular carcinoma

Table S 11 hepatocellular carcinoma

| Rank | lncRNA          | Evidence        | PMID     | Rank | lncRNA       | Evidence      | PMID     |
|------|-----------------|-----------------|----------|------|--------------|---------------|----------|
| 1    | MT1JP           | lnc2Cancer      | 26909858 | 16   | SOX2-OT      | LncRNADisease | 26097588 |
| 2    | OIP5-AS1        | lnc2Cancer      | 32042127 | 17   | BANCR        | LncRNADisease | 26758762 |
| 3    | TCL6            | lnc2Cancer      | 32020591 | 18   | WT1-AS       | LncRNADisease | 26462627 |
| 4    | LINC01296       | lnc2Cancer      | 30988624 | 19   | RP51014016.1 | LncRNADisease | 25556502 |
| 5    | CCEPR           | LncRNADisease   | 27427851 | 20   | P8725        | LncRNADisease | 25900874 |
| 6    | LINC00628       | lnc2Cancer      | 30740671 | 21   | DUXAP10      | lnc2Cancer    | 30996112 |
| 7    | CPS1-IT1        | LncRNADisease   | 27248828 | 22   | GPC3-AS1     | LncRNADisease | 27573079 |
| 8    | ENST00000501583 | LncRNADisease   | 24876753 | 23   | uc001ncr     | LncRNADisease | 26674525 |
| 9    | MIR31HG         | lnc2Cancer      | 30176933 | 24   | LINC00339    | lnc2Cancer    | 31239716 |
| 10   | P16984          | LncRNADisease   | 25900874 | 25   | LINC00665    | LncRNADisease | 27499103 |
| 11   | CDKN2B-AS1      | LncRNADisease   | 25966845 | 26   | SBF2-AS1     | lnc2Cancer    | 30115383 |
| 12   | DLX6-AS1        | lnc2Cancer v3.0 | 29145165 | 27   | FAM83H-AS1   | lnc2Cancer    | 31599410 |
| 13   | CCAT1           | LncRNADisease   | 25884472 | 28   | LINC01018    | LncRNADisease | 25512078 |
| 14   | P23099          | LncRNADisease   | 25900874 | 29   | P9745        | LncRNADisease | 25900874 |
| 15   | DUXAP8          | lnc2Cancer v3.0 | 32022476 | 30   | FEZF1-AS1    | lnc2Cancer    | 29957463 |

## 5.3 Survivability analysis on dataset1

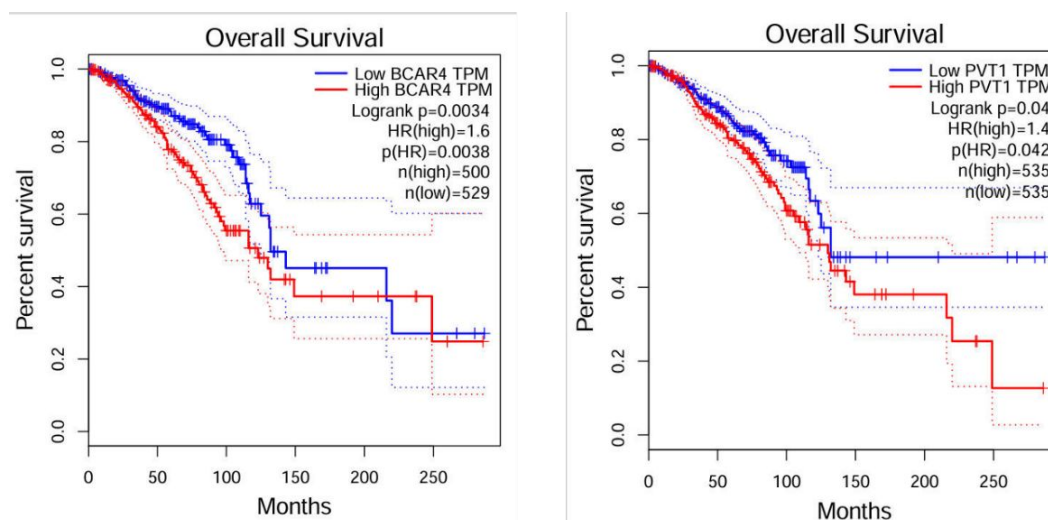

Figure S 7 Survivability analysis of breast cancer on dataset1

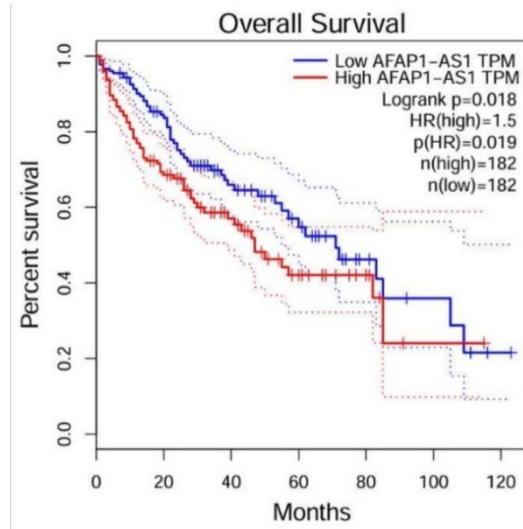

Figure S 8 Survivability analysis of hepatocellular carcinoma cancer on dataset1

#### 5.4 Survivability analysis on dataset2

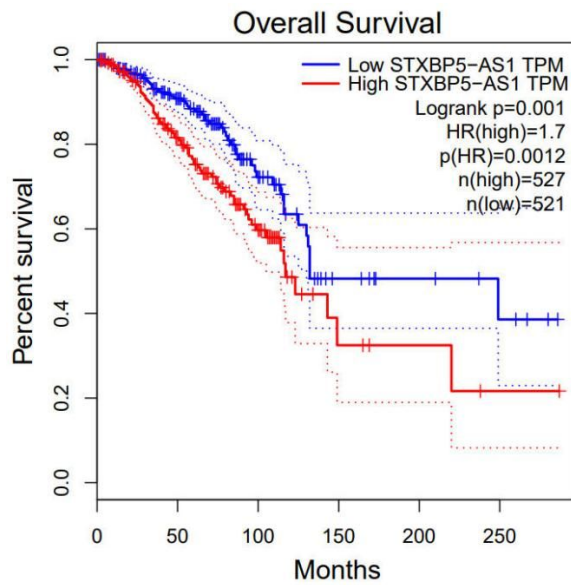

Figure S 9 Survivability analysis of breast cancer on dataset2

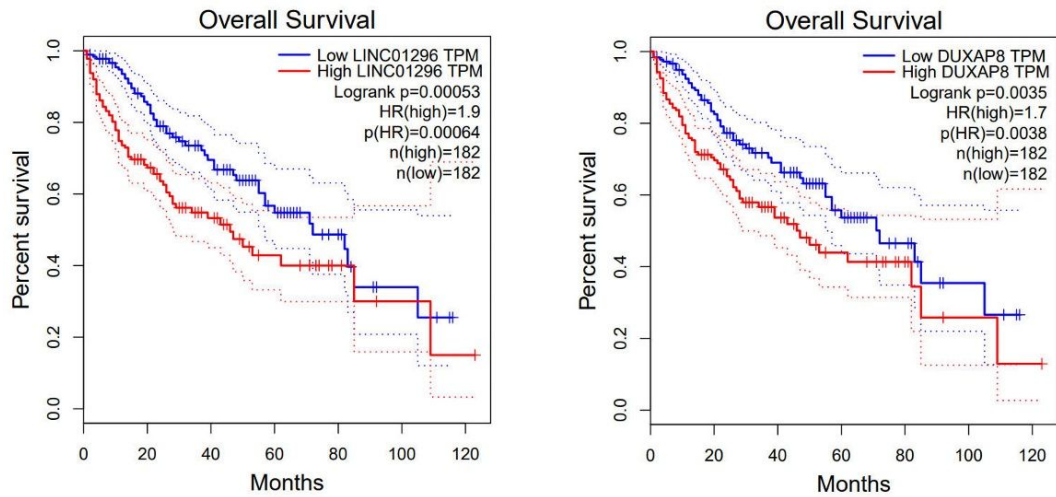

Figure S 10 Survivability analysis of hepatocellular carcinoma cancer on dataset2

## 6. Robustness experiments

Table S 12 Robustness experiments by 5-CV2

|           | Dataset1 | Dataset2 | Dataset3 | Dataset4 |
|-----------|----------|----------|----------|----------|
| ACC       | 0.9956   | 0.9942   | 0.9962   | 0.9888   |
| precision | 0.9796   | 0.9427   | 0.9773   | 0.9435   |
| Recall    | 0.8565   | 0.7349   | 0.8846   | 0.7399   |
| MCC       | 0.9139   | 0.8297   | 0.9279   | 0.8203   |
| F1-score  | 0.9139   | 0.8259   | 0.9286   | 0.8293   |
| AUC       | 0.9967   | 0.9888   | 0.9978   | 0.9860   |
| AUPR      | 0.9671   | 0.9222   | 0.9763   | 0.9125   |
